# Supplementary material
Source: Springer Nature journal article supplement (https://www.springermedizin.de/resource/supplementary/12882_2013_768_MOESM2_ESM.pdf/9454664)

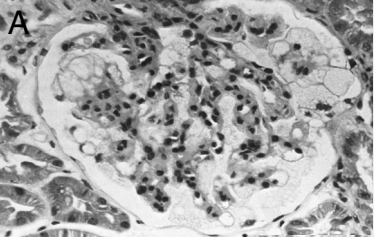

← H and E

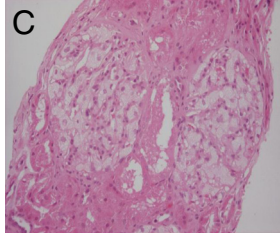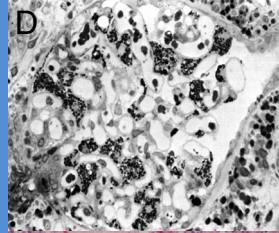

Toluene blue →

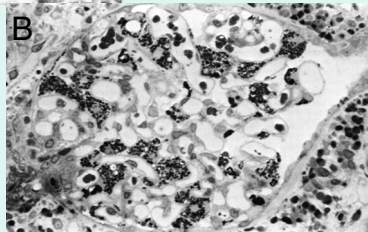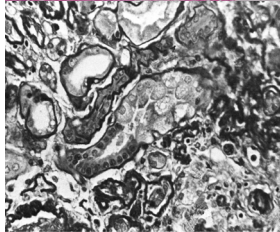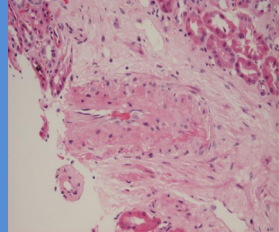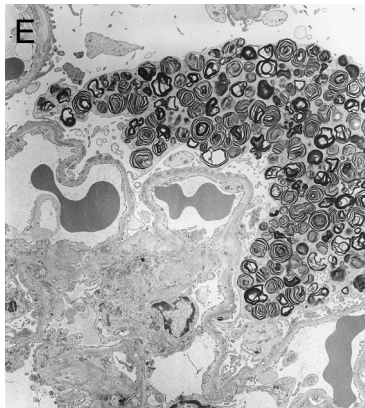

Supplement: MOESM2 [file 9454664]
